# Supplementary material for: Implementing volunteer peer mentoring as a supplement to professional efforts in primary rehabilitation of persons with spinal cord injury
Source: PubMed Central journal article supplement (PMC6892415; doi:10.1038/s41393-019-0294-0), 2019-05-23
Supplement: 41393_2019_294_MOESM1_ESM.pdf [file 41393_2019_294_MOESM1_ESM.pdf]

Implementing volunteer peer mentoring as a supplement to professional efforts in primary rehabilitation of persons with spinal cord injury

**Questions and response options – In Danish and translated into English**

| Spørgsmål                                                                                                                                                                                                                                                                                                                                                                                                                               | Svarmulighed                                                                                                                                                                                                 | Question                                                                                                                                                                                                                                                                                                                                                                                                                                                                                       | Response option                                                                                                                                                                                                           |
|-----------------------------------------------------------------------------------------------------------------------------------------------------------------------------------------------------------------------------------------------------------------------------------------------------------------------------------------------------------------------------------------------------------------------------------------|--------------------------------------------------------------------------------------------------------------------------------------------------------------------------------------------------------------|------------------------------------------------------------------------------------------------------------------------------------------------------------------------------------------------------------------------------------------------------------------------------------------------------------------------------------------------------------------------------------------------------------------------------------------------------------------------------------------------|---------------------------------------------------------------------------------------------------------------------------------------------------------------------------------------------------------------------------|
| <b>Spørgeskema 1 – før intervention</b>                                                                                                                                                                                                                                                                                                                                                                                                 |                                                                                                                                                                                                              | <b>Questionnaire 1 – before intervention</b>                                                                                                                                                                                                                                                                                                                                                                                                                                                   |                                                                                                                                                                                                                           |
| Dato                                                                                                                                                                                                                                                                                                                                                                                                                                    | Åbent tekstfelt                                                                                                                                                                                              | Date                                                                                                                                                                                                                                                                                                                                                                                                                                                                                           | Open text field                                                                                                                                                                                                           |
| Køn                                                                                                                                                                                                                                                                                                                                                                                                                                     | Mand/kvinde                                                                                                                                                                                                  | Gender                                                                                                                                                                                                                                                                                                                                                                                                                                                                                         | Male/female                                                                                                                                                                                                               |
| Fødselsdato                                                                                                                                                                                                                                                                                                                                                                                                                             | Åbent tekstfelt                                                                                                                                                                                              | Date of birth                                                                                                                                                                                                                                                                                                                                                                                                                                                                                  | Open text field                                                                                                                                                                                                           |
| Hvornår fik du din rygmarvsskade                                                                                                                                                                                                                                                                                                                                                                                                        | Åbent tekstfelt                                                                                                                                                                                              | When did you sustain your injury                                                                                                                                                                                                                                                                                                                                                                                                                                                               | Open text field                                                                                                                                                                                                           |
| Hvornår blev du indlagt på KRS/VCR                                                                                                                                                                                                                                                                                                                                                                                                      | Åbent tekstfelt                                                                                                                                                                                              | When were you admitted to the rehabilitation center                                                                                                                                                                                                                                                                                                                                                                                                                                            | Open text field                                                                                                                                                                                                           |
| Er dette din første indlæggelse på KRS/VCR                                                                                                                                                                                                                                                                                                                                                                                              | Ja/nej                                                                                                                                                                                                       | Is this your first admission to the SCI rehabilitation center                                                                                                                                                                                                                                                                                                                                                                                                                                  | Yes/no                                                                                                                                                                                                                    |
| Hvad er årsagen til din rygmarvsskade                                                                                                                                                                                                                                                                                                                                                                                                   | Sygdom/traume                                                                                                                                                                                                | What was the cause of your spinal cord injury                                                                                                                                                                                                                                                                                                                                                                                                                                                  | Disease/trauma                                                                                                                                                                                                            |
| Hvad er dit skadesniveau (Skriv gerne AIS score)                                                                                                                                                                                                                                                                                                                                                                                        | Åbent tekstfelt                                                                                                                                                                                              | What is the level of your injury (Please write the AIS score if possible)                                                                                                                                                                                                                                                                                                                                                                                                                      | Open text field                                                                                                                                                                                                           |
| Hvordan er din familiære situation lige nu                                                                                                                                                                                                                                                                                                                                                                                              | <ul style="list-style-type: none"> <li>• Gift eller bor med partner</li> <li>• Bor alene</li> <li>• Bor hos forældre</li> <li>• Andet</li> </ul>                                                             | How is your family situation right now                                                                                                                                                                                                                                                                                                                                                                                                                                                         | <ul style="list-style-type: none"> <li>• Married or living with partner</li> <li>• Living alone</li> <li>• Living with parents</li> <li>• Other</li> </ul>                                                                |
| Har du børn                                                                                                                                                                                                                                                                                                                                                                                                                             | Ja/nej                                                                                                                                                                                                       | Do you have children                                                                                                                                                                                                                                                                                                                                                                                                                                                                           | Yes/no                                                                                                                                                                                                                    |
| Hvor stor en del af tiden i de sidste 4 uger har du <ul style="list-style-type: none"> <li>• følt dig veloplagt og fuld af liv</li> <li>• været meget nervøs</li> <li>• været så langt nede, at intet kunne opmuntre dig</li> <li>• følt dig rolig og afslappet</li> <li>• følt dig fuld af energi</li> <li>• følt dig trist til mode</li> <li>• følt dig udslidt</li> <li>• været glad og tilfreds</li> <li>• følt dig træt</li> </ul> | <ul style="list-style-type: none"> <li>• Hele tiden</li> <li>• Det meste af tiden</li> <li>• En hel del af tiden</li> <li>• Noget af tiden</li> <li>• Lidt af tiden</li> <li>• På intet tidspunkt</li> </ul> | How much of the time during the past 4 weeks <ul style="list-style-type: none"> <li>• did you feel full of pep</li> <li>• have you been a very nervous person</li> <li>• have you felt so down in the dumps that nothing could cheer you up</li> <li>• have you felt calm and peaceful</li> <li>• did you have a lot of energy</li> <li>• have you felt downhearted and blue</li> <li>• did you feel worn out</li> <li>• have you been a happy person</li> <li>• did you feel tired</li> </ul> | <ul style="list-style-type: none"> <li>• All of the time</li> <li>• Most of the time</li> <li>• A good bit of the time</li> <li>• Some of the time</li> <li>• A little of the time</li> <li>• None of the time</li> </ul> |
| Når du tænker på dit liv og dine personlige omstændigheder, hvor tilfreds har du været med dit liv de sidste 4 uger                                                                                                                                                                                                                                                                                                                     | 0-10 skala                                                                                                                                                                                                   | Thinking about your own life and personal circumstances in the past four weeks, how satisfied are you with your life as a whole                                                                                                                                                                                                                                                                                                                                                                | 0-10 numeric rating scale                                                                                                                                                                                                 |
| Hvor tilfreds er du med dit fysiske helbred de sidste 4 uger                                                                                                                                                                                                                                                                                                                                                                            | 0-10 skala                                                                                                                                                                                                   | How satisfied are you with your physical health in the past four weeks                                                                                                                                                                                                                                                                                                                                                                                                                         | 0-10 numeric rating scale                                                                                                                                                                                                 |
| Hvor tilfreds er du med dit psykiske helbred, følelser og humør de sidste 4                                                                                                                                                                                                                                                                                                                                                             | 0-10 skala                                                                                                                                                                                                   | How satisfied are you with your psychological health, emotions and                                                                                                                                                                                                                                                                                                                                                                                                                             | 0-10 numeric rating scale                                                                                                                                                                                                 |

Implementing volunteer peer mentoring as a supplement to professional efforts in primary rehabilitation of persons with spinal cord injury

**Questions and response options – In Danish and translated into English**

| Spørgsmål                                                                                                                                                                                                                                                                                                                                          | Svarmulighed                                                                                                                                                                                                                                                                                                                                                                                                                                                                     | Question                                                                                                                                                                                                                                                                                               | Response option                                                                                                                                                                                                                                                                                                                                                                                                                                                          |
|----------------------------------------------------------------------------------------------------------------------------------------------------------------------------------------------------------------------------------------------------------------------------------------------------------------------------------------------------|----------------------------------------------------------------------------------------------------------------------------------------------------------------------------------------------------------------------------------------------------------------------------------------------------------------------------------------------------------------------------------------------------------------------------------------------------------------------------------|--------------------------------------------------------------------------------------------------------------------------------------------------------------------------------------------------------------------------------------------------------------------------------------------------------|--------------------------------------------------------------------------------------------------------------------------------------------------------------------------------------------------------------------------------------------------------------------------------------------------------------------------------------------------------------------------------------------------------------------------------------------------------------------------|
| uger                                                                                                                                                                                                                                                                                                                                               |                                                                                                                                                                                                                                                                                                                                                                                                                                                                                  | mood in the past four weeks                                                                                                                                                                                                                                                                            |                                                                                                                                                                                                                                                                                                                                                                                                                                                                          |
| Har du smerter<br>Hvis ja:<br><ul style="list-style-type: none"> <li>• På en skala fra 0-10, hvordan vil du beskrive din smerte</li> <li>• Hvordan vurderer du din smerte, når den er mindst intens</li> <li>• Hvordan vurderer du din gennemsnitlige smerte gennem de seneste 2 døgn</li> <li>• Hvordan vurderer du din smerte lige nu</li> </ul> | Ja/nej<br><br>0-10 skala                                                                                                                                                                                                                                                                                                                                                                                                                                                         | Do you have pain<br>If yes:<br><ul style="list-style-type: none"> <li>• On a 0-10 scale, how will you rate your pain</li> <li>• How is your pain, when it is least intense</li> <li>• How do you rate your average pain over the last 2 days</li> <li>• How do you rate your pain right now</li> </ul> | Yes/no<br><br>0-10 numeric rating scale                                                                                                                                                                                                                                                                                                                                                                                                                                  |
| Hvem fortalte dig først om mentorordningen                                                                                                                                                                                                                                                                                                         | <ul style="list-style-type: none"> <li>• Personalet</li> <li>• En folder</li> <li>• Opslag</li> <li>• En anden patient</li> <li>• Hjemmeside</li> <li>• Mentorkontaktpersonen opsøgte mig</li> <li>• En anden mentor</li> <li>• Andet</li> </ul>                                                                                                                                                                                                                                 | From where did you first hear about the mentoring                                                                                                                                                                                                                                                      | <ul style="list-style-type: none"> <li>• Staff</li> <li>• A leaflet</li> <li>• A poster</li> <li>• A fellow patient</li> <li>• A website</li> <li>• Project personnel came to me</li> <li>• A mentor came to me</li> <li>• Other</li> </ul>                                                                                                                                                                                                                              |
| Hvad ønsker du, at du og din mentor kommer til at tale om                                                                                                                                                                                                                                                                                          | <ul style="list-style-type: none"> <li>• Sygdommen eller ulykken der var årsag til min rygmarvsskade</li> <li>• Livet som patient under indlæggelsen</li> <li>• livet efter udskrivelse</li> <li>• Familie</li> <li>• Venner</li> <li>• Arbejde/uddannelse</li> <li>• Forsørgelse</li> <li>• Fritidsinteresser</li> <li>• Sex og samliv</li> <li>• Blære- og tarmfunktion</li> <li>• Smerter</li> <li>• Hjælpe midler</li> <li>• Praktiske problemer</li> <li>• Andet</li> </ul> | Which issues do you wish/want to talk to your mentor about                                                                                                                                                                                                                                             | <ul style="list-style-type: none"> <li>• Trauma or disease that caused my injury</li> <li>• My life during hospitalization</li> <li>• My life after hospitalization</li> <li>• Family</li> <li>• Friends</li> <li>• Work and education</li> <li>• My economy</li> <li>• Leisure activities</li> <li>• Sexuality</li> <li>• Bladder and bowel function</li> <li>• Pain</li> <li>• Aids and equipment</li> <li>• Practical problems in general</li> <li>• Other</li> </ul> |
| Tror du at det kan være en fordel for dig i nogle situationer at tale med en mentor frem for at tale med en                                                                                                                                                                                                                                        | Ja/nej/ved ikke                                                                                                                                                                                                                                                                                                                                                                                                                                                                  | Do you think it might be an advantage for you in some situations to talk to a mentor instead of a professional staff                                                                                                                                                                                   | Yes/no/do not know                                                                                                                                                                                                                                                                                                                                                                                                                                                       |

Implementing volunteer peer mentoring as a supplement to professional efforts in primary rehabilitation of persons with spinal cord injury

**Questions and response options – In Danish and translated into English**

| Spørgsmål                                                                                                                                                                                                                                                                                                                                                                                                                               | Svarmulighed                                                                                                                                                                                                 | Question                                                                                                                                                                                                                                                                                                                                                                                                                                                                                       | Response option                                                                                                                                                                                                           |
|-----------------------------------------------------------------------------------------------------------------------------------------------------------------------------------------------------------------------------------------------------------------------------------------------------------------------------------------------------------------------------------------------------------------------------------------|--------------------------------------------------------------------------------------------------------------------------------------------------------------------------------------------------------------|------------------------------------------------------------------------------------------------------------------------------------------------------------------------------------------------------------------------------------------------------------------------------------------------------------------------------------------------------------------------------------------------------------------------------------------------------------------------------------------------|---------------------------------------------------------------------------------------------------------------------------------------------------------------------------------------------------------------------------|
| fagperson                                                                                                                                                                                                                                                                                                                                                                                                                               |                                                                                                                                                                                                              | member                                                                                                                                                                                                                                                                                                                                                                                                                                                                                         |                                                                                                                                                                                                                           |
| Tror du at det kan være en fordel for dig i nogle situationer at tale med en mentor frem for at tale med din familie eller venner                                                                                                                                                                                                                                                                                                       | Ja/nej/ved ikke                                                                                                                                                                                              | Do you think it might be an advantage for you in some situations to talk to a mentor instead of a member of your family or friends                                                                                                                                                                                                                                                                                                                                                             | Yes/no/do not know                                                                                                                                                                                                        |
| Hvad håber og/eller forventer du at få ud af at deltage i mentorordningen                                                                                                                                                                                                                                                                                                                                                               | Åbent tekstfelt                                                                                                                                                                                              | What do you hope for / expect to get out of meeting with a mentor?                                                                                                                                                                                                                                                                                                                                                                                                                             | Open text field                                                                                                                                                                                                           |
| Har du nogen kommentarer                                                                                                                                                                                                                                                                                                                                                                                                                | Åbent tekstfelt                                                                                                                                                                                              | Do you have any comments                                                                                                                                                                                                                                                                                                                                                                                                                                                                       | Open text field                                                                                                                                                                                                           |
| <b>Spørgeskema 2 – efter intervention</b>                                                                                                                                                                                                                                                                                                                                                                                               |                                                                                                                                                                                                              | <b>Questionnaire 2 – after intervention</b>                                                                                                                                                                                                                                                                                                                                                                                                                                                    |                                                                                                                                                                                                                           |
| Dato                                                                                                                                                                                                                                                                                                                                                                                                                                    | Åbent tekstfelt                                                                                                                                                                                              | Date                                                                                                                                                                                                                                                                                                                                                                                                                                                                                           | Open text field                                                                                                                                                                                                           |
| Hvor længe har du været indlagt på KRS/VCR                                                                                                                                                                                                                                                                                                                                                                                              | Åbent tekstfelt                                                                                                                                                                                              | For how long have you been at the rehabilitation center                                                                                                                                                                                                                                                                                                                                                                                                                                        | Open text field                                                                                                                                                                                                           |
| Hvordan er din familiære situation lige nu                                                                                                                                                                                                                                                                                                                                                                                              | <ul style="list-style-type: none"> <li>• Gift eller bor med partner</li> <li>• Bor alene</li> <li>• Bor hos forældre</li> <li>• Andet</li> </ul>                                                             | How is your family situation right now                                                                                                                                                                                                                                                                                                                                                                                                                                                         | <ul style="list-style-type: none"> <li>• Married or living with partner</li> <li>• Living alone</li> <li>• Living with parents</li> <li>• Other</li> </ul>                                                                |
| Hvor stor en del af tiden i de sidste 4 uger har du <ul style="list-style-type: none"> <li>• følt dig veloplagt og fuld af liv</li> <li>• været meget nervøs</li> <li>• været så langt nede, at intet kunne opmuntre dig</li> <li>• følt dig rolig og afslappet</li> <li>• følt dig fuld af energi</li> <li>• følt dig trist til mode</li> <li>• følt dig udslidt</li> <li>• været glad og tilfreds</li> <li>• følt dig træt</li> </ul> | <ul style="list-style-type: none"> <li>• Hele tiden</li> <li>• Det meste af tiden</li> <li>• En hel del af tiden</li> <li>• Noget af tiden</li> <li>• Lidt af tiden</li> <li>• På intet tidspunkt</li> </ul> | How much of the time during the past 4 weeks <ul style="list-style-type: none"> <li>• did you feel full of pep</li> <li>• have you been a very nervous person</li> <li>• have you felt so down in the dumps that nothing could cheer you up</li> <li>• have you felt calm and peaceful</li> <li>• did you have a lot of energy</li> <li>• have you felt downhearted and blue</li> <li>• did you feel worn out</li> <li>• have you been a happy person</li> <li>• did you feel tired</li> </ul> | <ul style="list-style-type: none"> <li>• All of the time</li> <li>• Most of the time</li> <li>• A good bit of the time</li> <li>• Some of the time</li> <li>• A little of the time</li> <li>• None of the time</li> </ul> |
| Når du tænker på dit liv og dine personlige omstændigheder, hvor tilfreds har du været med dit liv de sidste 4 uger                                                                                                                                                                                                                                                                                                                     | 0-10 skala                                                                                                                                                                                                   | Thinking about your own life and personal circumstances in the past four weeks, how satisfied are you with your life as a whole                                                                                                                                                                                                                                                                                                                                                                | 0-10 numeric rating scale                                                                                                                                                                                                 |
| Hvor tilfreds er du med dit fysiske helbred de sidste 4 uger                                                                                                                                                                                                                                                                                                                                                                            | 0-10 skala                                                                                                                                                                                                   | How satisfied are you with your physical health in the past four weeks                                                                                                                                                                                                                                                                                                                                                                                                                         | 0-10 numeric rating scale                                                                                                                                                                                                 |
| Hvor tilfreds er du med dit psykiske helbred, følelser og humør de sidste 4 uger                                                                                                                                                                                                                                                                                                                                                        | 0-10 skala                                                                                                                                                                                                   | How satisfied are you with your psychological health, emotions and mood in the past four weeks                                                                                                                                                                                                                                                                                                                                                                                                 | 0-10 numeric rating scale                                                                                                                                                                                                 |

Implementing volunteer peer mentoring as a supplement to professional efforts in primary rehabilitation of persons with spinal cord injury

**Questions and response options – In Danish and translated into English**

| <b>Spørgsmål</b>                                                                                                                                                                                                                                                                                                                                        | <b>Svarmulighed</b>                                                                                                                                                                                                                                                                                                                                                                                                                                          | <b>Question</b>                                                                                                                                                                                                                                                                                             | <b>Response option</b>                                                                                                                                                                                                                                                                                                                                                                                                                                                   |
|---------------------------------------------------------------------------------------------------------------------------------------------------------------------------------------------------------------------------------------------------------------------------------------------------------------------------------------------------------|--------------------------------------------------------------------------------------------------------------------------------------------------------------------------------------------------------------------------------------------------------------------------------------------------------------------------------------------------------------------------------------------------------------------------------------------------------------|-------------------------------------------------------------------------------------------------------------------------------------------------------------------------------------------------------------------------------------------------------------------------------------------------------------|--------------------------------------------------------------------------------------------------------------------------------------------------------------------------------------------------------------------------------------------------------------------------------------------------------------------------------------------------------------------------------------------------------------------------------------------------------------------------|
| <p>Har du smerter<br/>Hvis ja:</p> <ul style="list-style-type: none"> <li>• På en skala fra 0-10, hvordan vil du beskrive din smerte</li> <li>• Hvordan vurderer du din smerte, når den er mindst intens</li> <li>• Hvordan vurderer du din gennemsnitlige smerte gennem de seneste 2 døgn</li> <li>• Hvordan vurderer du din smerte lige nu</li> </ul> | <p>Ja/nej</p> <p>0-10 skala</p>                                                                                                                                                                                                                                                                                                                                                                                                                              | <p>Do you have pain<br/>If yes:</p> <ul style="list-style-type: none"> <li>• On a 0-10 scale, how will you rate your pain</li> <li>• How is your pain, when it is least intense</li> <li>• How do you rate your average pain over the last 2 days</li> <li>• How do you rate your pain right now</li> </ul> | <p>Yes/no</p> <p>0-10 numeric rating scale</p>                                                                                                                                                                                                                                                                                                                                                                                                                           |
| <p>Hvor mange gange har du haft møde med din mentor</p>                                                                                                                                                                                                                                                                                                 | <ul style="list-style-type: none"> <li>• 1 gang</li> <li>• 2 gange</li> <li>• 3 gange</li> <li>• Andet</li> </ul>                                                                                                                                                                                                                                                                                                                                            | <p>How many sessions have you had with your mentor</p>                                                                                                                                                                                                                                                      | <ul style="list-style-type: none"> <li>• One</li> <li>• Two</li> <li>• Three</li> <li>• Other</li> </ul>                                                                                                                                                                                                                                                                                                                                                                 |
| <p>Mener du, at det var et passende antal møder</p>                                                                                                                                                                                                                                                                                                     | <ul style="list-style-type: none"> <li>• Ja, det var passende</li> <li>• Nej, det var for få møder</li> <li>• Nej, det var for mange møder</li> </ul>                                                                                                                                                                                                                                                                                                        | <p>Do you think that the number of meetings was appropriate</p>                                                                                                                                                                                                                                             | <ul style="list-style-type: none"> <li>• Yes, it was appropriate</li> <li>• No, it was too few meetings</li> <li>• No, it was too many meetings</li> </ul>                                                                                                                                                                                                                                                                                                               |
| <p>Hvor mødtes I</p>                                                                                                                                                                                                                                                                                                                                    | <ul style="list-style-type: none"> <li>• På centeret</li> <li>• Andet</li> </ul>                                                                                                                                                                                                                                                                                                                                                                             | <p>Where did you meet</p>                                                                                                                                                                                                                                                                                   | <ul style="list-style-type: none"> <li>• At the rehabilitation center</li> <li>• Other</li> </ul>                                                                                                                                                                                                                                                                                                                                                                        |
| <p>Hvor lang tid varede møderne (Svar for hvert møde)</p>                                                                                                                                                                                                                                                                                               | <ul style="list-style-type: none"> <li>• Under 1 time</li> <li>• Ca. 1 time</li> <li>• 1-2 timer</li> <li>• Mere end 2 timer</li> </ul>                                                                                                                                                                                                                                                                                                                      | <p>How long did the meetings last (report for each meeting)</p>                                                                                                                                                                                                                                             | <ul style="list-style-type: none"> <li>• Less than an hour</li> <li>• Approximately one hour</li> <li>• Between one and two hours</li> <li>• More than two hours</li> </ul>                                                                                                                                                                                                                                                                                              |
| <p>Hvad var det vigtigste, du og din mentor talte om</p>                                                                                                                                                                                                                                                                                                | <ul style="list-style-type: none"> <li>• Sygdommen eller ulykken der var årsag til min rygmærskade</li> <li>• Livet som patient under indlæggelsen</li> <li>• Livet efter udskrivelse</li> <li>• Familie</li> <li>• Venner</li> <li>• Arbejde/uddannelse</li> <li>• Forsørgelse</li> <li>• Fritidsinteresser</li> <li>• Sex og samliv</li> <li>• Blære- og tarmfunktion</li> <li>• Smerter</li> <li>• Hjælpemidler</li> <li>• Praktiske problemer</li> </ul> | <p>What was the most important issues, that you and your mentor discussed</p>                                                                                                                                                                                                                               | <ul style="list-style-type: none"> <li>• Trauma or disease that caused my injury</li> <li>• My life during hospitalization</li> <li>• My life after hospitalization</li> <li>• Family</li> <li>• Friends</li> <li>• Work and education</li> <li>• My economy</li> <li>• Leisure activities</li> <li>• Sexuality</li> <li>• Bladder and bowel function</li> <li>• Pain</li> <li>• Aids and equipment</li> <li>• Practical problems in general</li> <li>• Other</li> </ul> |

Implementing volunteer peer mentoring as a supplement to professional efforts in primary rehabilitation of persons with spinal cord injury

**Questions and response options – In Danish and translated into English**

| Spørgsmål                                                                                                                                                         | Svarmulighed                                                                                                                                                                               | Question                                                                                                                                                          | Response option                                                                                                                                                               |
|-------------------------------------------------------------------------------------------------------------------------------------------------------------------|--------------------------------------------------------------------------------------------------------------------------------------------------------------------------------------------|-------------------------------------------------------------------------------------------------------------------------------------------------------------------|-------------------------------------------------------------------------------------------------------------------------------------------------------------------------------|
|                                                                                                                                                                   | <ul style="list-style-type: none"> <li>• Andet</li> </ul>                                                                                                                                  |                                                                                                                                                                   |                                                                                                                                                                               |
| Var det en fordel for dig i nogle situationer at tale med en mentor frem for at tale med en fagperson                                                             | Ja/nej/ved ikke                                                                                                                                                                            | Was it an advantage for you in some situations to talk to a mentor instead of a professional staff member                                                         | Yes/no/do not know                                                                                                                                                            |
| Var det en fordel for dig i nogle situationer at tale med en mentor frem for at tale med din familie eller venner                                                 | Ja/nej/ved ikke                                                                                                                                                                            | Was it an advantage for you in some situations to talk to a mentor instead of a member of your family or friends                                                  | Yes/no/do not know                                                                                                                                                            |
| Var den mentor, som blev valgt til dig, den rette til at indgå i samtaler med dig i forhold til de emner, du ønskede at tale om                                   | Ja/nej                                                                                                                                                                                     | Was the mentor that was selected for you the right one to talk to, regarding the issues that you wanted to talk about                                             | Yes/no                                                                                                                                                                        |
| Har du haft den samme mentor gennem hele forløbet                                                                                                                 | <ul style="list-style-type: none"> <li>• Ja</li> <li>• Nej, jeg bad om at få en anden mentor</li> <li>• Nej, jeg fik en anden uden selv at have bedt om det</li> </ul>                     | Have you had the same mentor throughout the process                                                                                                               | <ul style="list-style-type: none"> <li>• Yes</li> <li>• No, I asked for another mentor</li> <li>• No, I was given another mentor without having asked for it</li> </ul>       |
| Har du oplevet at møde den mentor-kontaktperson, der er ansat på KRS/VCR, mens du har været indlagt<br><br>Hvis ja: i hvilken sammenhæng mødte du kontaktpersonen | Ja/nej<br><br><ul style="list-style-type: none"> <li>• Jeg har bare set ham/hende</li> <li>• Jeg har talt med ham/hende</li> <li>• Jeg har deltaget i aktiviteter med ham/hende</li> </ul> | Have you experienced meeting the mentor contact person, who is employed at the rehabilitation center, during your hospitalization<br><br>If yes: How did you meet | Yes/no<br><br><ul style="list-style-type: none"> <li>• I just saw him/her</li> <li>• I talked to him/her</li> <li>• I participated in some activities with him/her</li> </ul> |
| Skriv med egne ord, hvad du har fået ud af at deltage i mentorordningen                                                                                           | Åbent tekstfelt                                                                                                                                                                            | Write in your own words what you have gained from participating in the mentoring program                                                                          | Open text field                                                                                                                                                               |
| Vil du anbefale andre at tage imod tilbud om at tale med en mentor                                                                                                | Ja/nej/ved ikke                                                                                                                                                                            | Would you recommend others to meet with a mentor                                                                                                                  | Yes/no/do not know                                                                                                                                                            |
| Har du nogen kommentarer                                                                                                                                          | Åbent tekstfelt                                                                                                                                                                            | Do you have any comments                                                                                                                                          | Open text field                                                                                                                                                               |
